# Supplementary material
Source: Springer Nature journal article supplement (https://www.springermedizin.de/resource/supplementary/12959_2009_121_MOESM3_ESM.pdf/9569656)

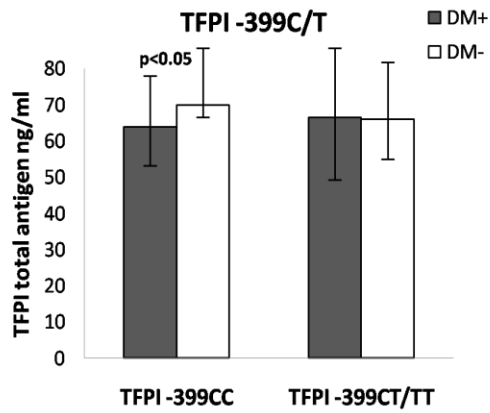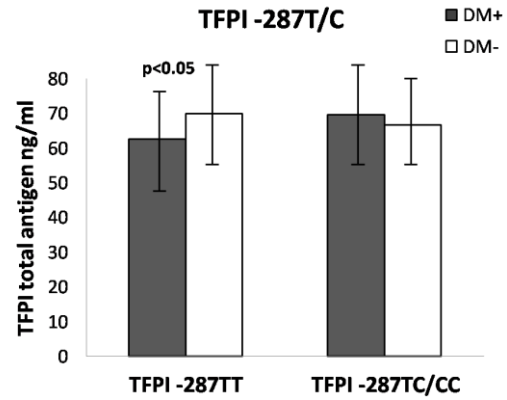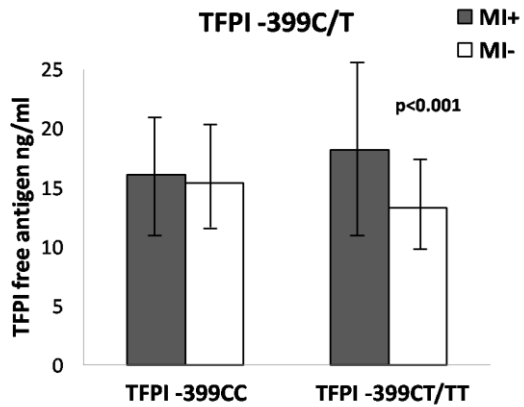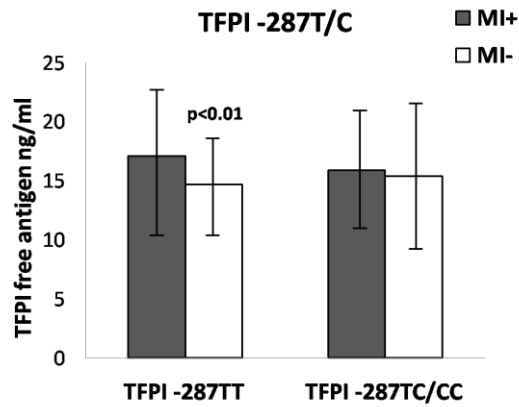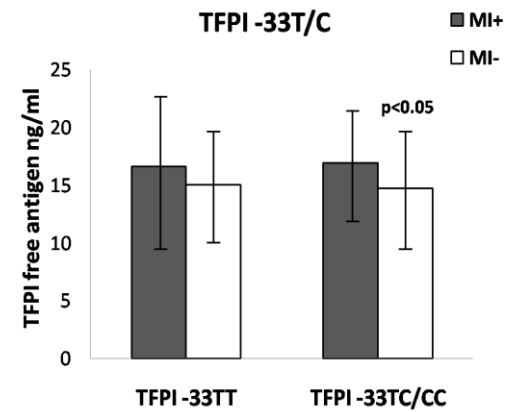

Figure 1

Supplement: MOESM3 [file 9569656]
